Correction

# Correction: Population Expansion and Genetic Structure in *Carcharhinus brevipinna* in the Southern Indo-Pacific

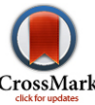

## The PLOS ONE Staff

The second affiliation for the fourth author is not indicated. Sabine P. Wintner is affiliated with KwaZulu-Natal Sharks Board, Umhlanga Rocks, KwaZulu-Natal, South Africa and Biomedical Resource Unit, University of KwaZulu-Natal, Durban, South Africa.

## Reference

1. Geraghty PT, Williamson JE, Macbeth WG, Wintner SP, Harry AV, et al. (2013) Population Expansion and Genetic Structure in *Carcharhinus brevipinna* in the Southern Indo-Pacific. PLoS ONE 8(9): e75169. doi:10.1371/journal.pone.0075169

**Citation:** The PLOS ONE Staff (2014) Correction: Population Expansion and Genetic Structure in *Carcharhinus brevipinna* in the Southern Indo-Pacific. PLoS ONE 9(4): e94738. doi:10.1371/journal.pone.0094738

**Published:** April 9, 2014

**Copyright:** © 2014 The PLOS ONE Staff. This is an open-access article distributed under the terms of the Creative Commons Attribution License, which permits unrestricted use, distribution, and reproduction in any medium, provided the original author and source are credited.
